# Supplementary material for: Kaempferol Suppresses the Activation of Mast Cells by Modulating the Expression of FcεRI and SHIP1
Source: MDPI journal article supplement (doi:10.3390/ijms24065997), 2023-03-22
Supplement: s1 [file s1]

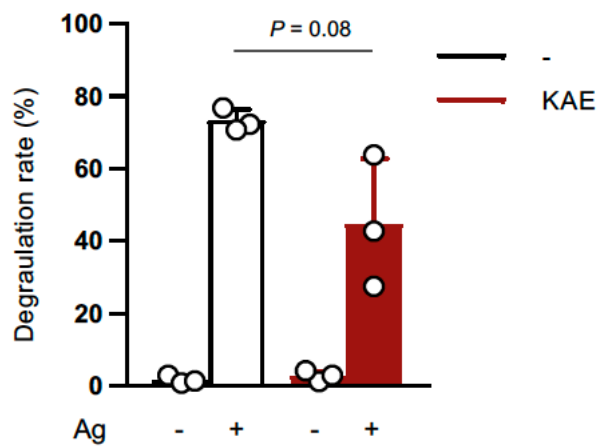

**Supplemental Figure S1.** Effects of kaempferol on degranulation of peritoneal mast cells. Peritoneal mast cells were pre-incubated in the presence or absence of KAE (100  $\mu$ M) for 24 h. After sensitization with anti-TNP-IgE, the cells were incubated in Tyrode's buffer w/ or w/o TNP-BSA, and the supernatant was collected for  $\beta$ -hexosaminidase assay. The data represents the mean  $\pm$  SEM of 3 individuals, and two tailed paired t-test were used for statistical analyses. Abbreviation: Ag, Antigen; KAE, Kaempferol.

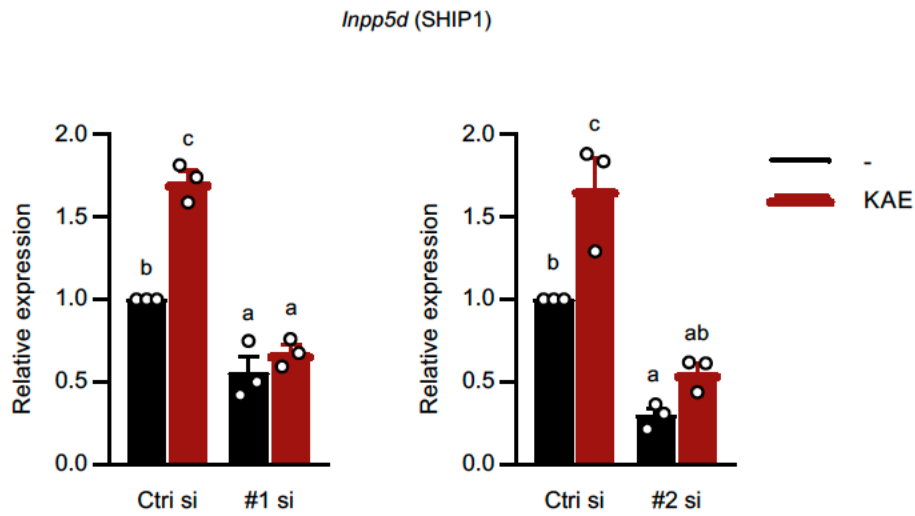

**Supplemental Figure S2.** The knockdown efficacy of SHIP1 by siRNA transfection.

mRNA expression levels of SHIP1 (*Inppd5*) in siRNA transfected BMMCs. BMMCs were transfected with SHIP1 siRNA (siRNA #1: left, #2: right) and cultured for 48h followed by the treatment with KAE 10  $\mu$ M for 24h. The cells were harvested to assess mRNA levels by qPCR (normalized by  $\beta$ -actin). The data represent the mean  $\pm$  SEM of 3 independent experiments, and Tukey's multiple comparison test was used for statistical analyses. Abbreviation: KAE, Kaempferol.
